# Supplementary material
Source: PubMed Central journal article supplement (PMC4605890)
Supplement: NIHMS722472-supplement.pdf [file NIHMS722472-supplement.pdf]

## Supplementary Information

### Regenerating patient-specific vascular tissue with macroporous nanofibrous scaffolds and induced pluripotent stem cells-derived cardiovascular progenitor cells

Jiang Hu, Yongyu Wang, Jiao Jiao, Zhongning Liu, Chao Zhao, Zhou Zhou, Zhanpeng Zhang, Kaitlynn Forde, Lunchang Wang, Jiangang Wang, David J. Baylink, Xiao-Bing Zhang, Shaorong Gao, Bo Yang, Y. Eugene Chen, Peter X. Ma

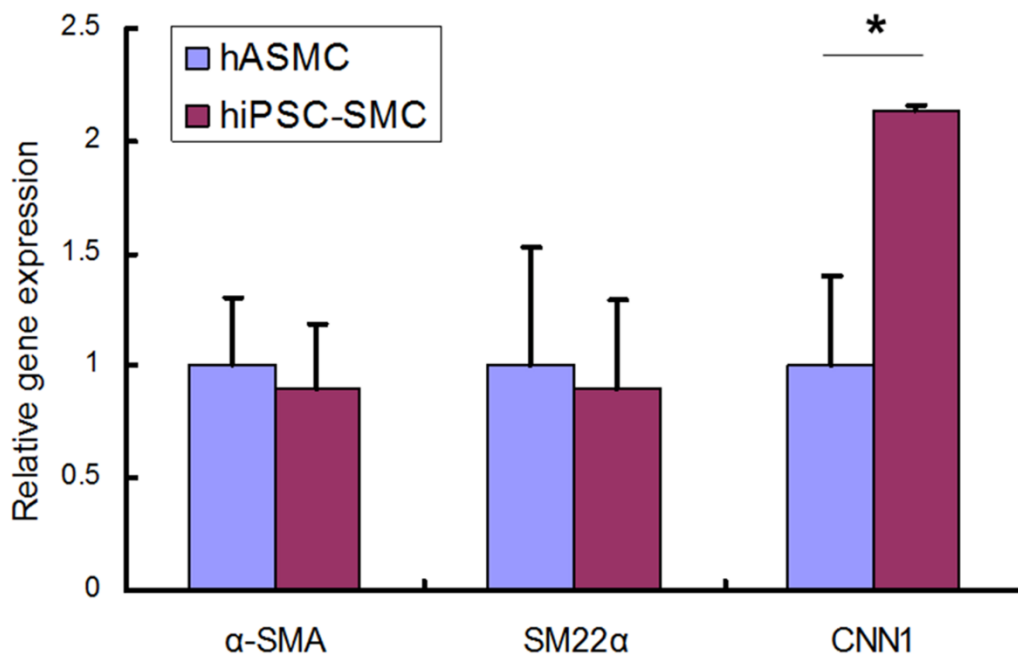

Supplementary Fig. S1. Characterization of smooth muscle cell marker gene expression of hiPSC-derived vascular smooth muscle cells (hiPSC-VSMCs). The gene expression levels were compared with primary aortic smooth muscle cells (hASMCs). Data shown are presented as mean  $\pm$  SEM ( $n = 3$ ). \*,  $P < 0.05$  vs hASMCs.

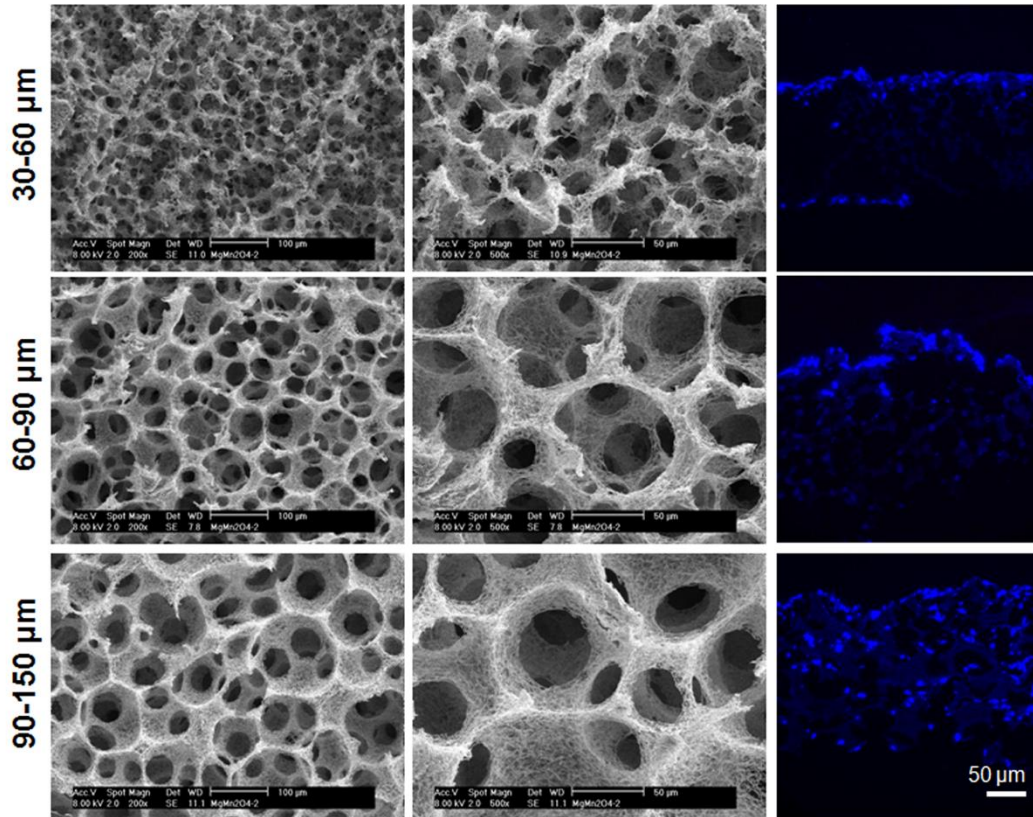

Supplementary Fig. S2. Cell seeding and infiltration into macroporous nanofibrous scaffolds with different pore size. Primary human aortic smooth muscle cells were seeded and the cell-scaffold constructs were cross-sectioned and stained with 4',6-diamidino-2-phenylindole (DAPI) after 24 hr of seeding and culture. Left panel and middle panel: scanning electron microscopic observation of the scaffolds at low and high magnification respectively. Right panel: nuclei staining with DAPI showing the cell infiltration into the scaffolds. Scale bar = 50  $\mu\text{m}$ .

Table S1. Primary antibodies used for immunofluorescence staining

| Antibodies    | Source      | Dilution | Manufacturer                         | Cat. No.      |
|---------------|-------------|----------|--------------------------------------|---------------|
| OCT4          | Rabbit IgG  | 1:100    | Stemgent                             | 09-0023       |
| NANOG         | Rabbit IgG  | 1:100    | Stemgent                             | 09-0020       |
| SOX2          | Rabbit IgG  | 1:100    | Stemgent                             | 09-0024       |
| TRA-1-81      | Mouse IgM   | 1:100    | Stemgent                             | 09-0011       |
| TRA-1-60      | Mouse IgM   | 1:100    | Stemgent                             | 09-0010       |
| SSEA3         | Rat IgM     | 1:100    | Developmental Studies Hybridoma Bank | MC-631        |
| SSEA4         | Mouse IgG3  | 1:100    | Developmental Studies Hybridoma Bank | MC-813-70     |
| ISL-1         | Mouse IgG2a | 1:100    | Developmental Studies Hybridoma Bank | 39.4D5        |
| MESP1         | Rabbit IgG  | 1:100    | Aviva Systems Biology                | ARP39374_P050 |
| $\alpha$ -SMA | Mouse IgG2a | 1:500    | Sigma                                | A5228         |
| SM22 $\alpha$ | Rabbit IgG  | 1:500    | Abcam                                | ab14106       |
| CNN1          | Mouse IgG1  | 1:500    | Sigma                                | C2687         |

Table S2. Primers used for qRT-PCR

| Genes         |         | Sequence                   |
|---------------|---------|----------------------------|
| OCT4          | Forward | AGTGCCCGAAACCCACACTG       |
|               | Reverse | ACCACACTCGGACCACATCCT      |
| Brachyury     | Forward | CAGTGGCAGTCTCAGGTTAAGAAGGA |
|               | Reverse | CGCTACTGCAGGTGTGAGCAA      |
| SOX17         | Forward | GTGGACCGCACGGAATTTG        |
|               | Reverse | GGAGATTCACACCGGAGTCA       |
| PAX6          | Forward | AACAGACACAGCCCTCACAAACA    |
|               | Reverse | CGGGAAGTTGAACTGGAAGTAC     |
| ISL1          | Forward | ATCAGGTTGTACGGGATCAAATG    |
|               | Reverse | ATGTGATACACCTTGGAGCG       |
| MESP1         | Forward | GCTTCCCTCTTTCCATCCAGGA     |
|               | Reverse | CCCTGAAAGACATCACTTGGAA     |
| NKX2-5        | Forward | CAAGTGTGCGTCTGCCTTT        |
|               | Reverse | CAGCTCTTTCTTTTCGGCTCTA     |
| PDGFRA        | Forward | TGGCAGTACCCCATGTCTGAA      |
|               | Reverse | CCAAGACCGTCACAAAAAGGC      |
| $\alpha$ -SMA | Forward | CACTGTCAGGAATCCTGTGA       |
|               | Reverse | CAAAGCCGGCCTTACAGA         |
| SM22 $\alpha$ | Forward | TCTTTGAAGGCAAAGACATGG      |
|               | Reverse | TTATGCTCCTGCGCTTTCTT       |
| CNN1          | Forward | GTCCACCCTCCTGGCTTT         |
|               | Reverse | AAACTTGTTGGTGCCCATCT       |
| Col1A1        | Forward | GCCTCAAGGTATTGCTGGAC       |
|               | Reverse | ACCTTGTTTGCCAGGTTTAC       |
| Col3A1        | Forward | CTGGACCCAGGGTCTTC          |
|               | Reverse | CATCTGATCCAGGGTTTCCA       |
| GAPDH         | Forward | AAGGTGAAGGTCGGAGTCAAC      |
|               | Reverse | GGGGTCATTGATGGCAACAATA     |
